# Supplementary material for: Structure-based identification of MHC binding peptides: Benchmarking of prediction accuracy
Source: Royal Society of Chemistry journal article supplement (doi:10.1039/c0mb00013b), 2010-10-18
Supplement: c0mb00013b.pdf [file c0mb00013b.pdf]

**Fig. S1:** ROC curves obtained by MJ and BT pair potential matrices for HLA-DRB1\*0101.

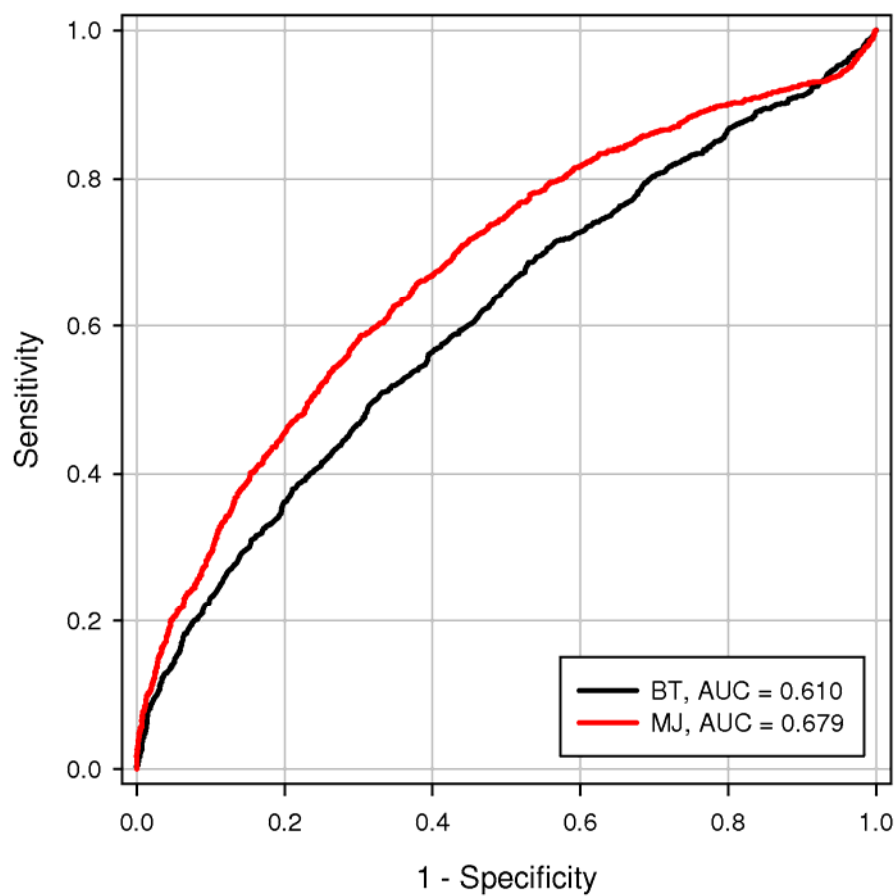

**Table S1:** List of alleles considered in this study for prediction of binding peptides by pair potential. The table lists the PDB IDs of the template used for prediction and whether it was a crystal structure or a structural model. Class II alleles are shown in bold fonts.

| S. No     | Allele                    | Template    | Crystal Structure / model |
|-----------|---------------------------|-------------|---------------------------|
| 1         | HLA-A*0201 (10)           | 1HHH        | Crystal Structure         |
| 2         | HLA-A*0201 (9)            | 1AKJ        | Crystal Structure         |
| 3         | HLA-A*1101 (9)            | 1Q94        | Crystal Structure         |
| 4         | HLA-A*2402 (9)            | 2BCK        | Crystal Structure         |
| 5         | HLA-A*2601 (9)            | 1Q94        | Model                     |
| 6         | HLA-A*6801 (9)            | 1AKJ        | Model                     |
| 7         | HLA-B*0702 (9)            | 1M05        | Model                     |
| 8         | HLA-B*0801 (9)            | 1M05        | Crystal Structure         |
| 9         | HLA-B*1501 (9)            | 1A9B        | Model                     |
| 10        | HLA-B*1801 (9)            | 1A9B        | Model                     |
| 11        | HLA-B*2703 (9)            | 1HSA        | Model                     |
| 12        | HLA-B*2704 (9)            | 1HSA        | Model                     |
| 13        | HLA-B*2705 (9)            | 1OGT        | Crystal Structure         |
| 14        | HLA-B*2705 (10)           | 1JGD        | Model                     |
| 15        | HLA-B*2706 (9)            | 1K5N        | Model                     |
| 16        | HLA-B*2709 (9)            | 1K5N        | Crystal Structure         |
| 17        | HLA-B*3701 (9)            | 1SYV        | Model                     |
| 18        | HLA-B*3901 (9)            | 1M05        | Model                     |
| 19        | HLA-B*4001 (9)            | 1M05        | Model                     |
| 20        | HLA-B*4402 (9)            | 1M6O        | Crystal Structure         |
| 21        | HLA-B*4701 (9)            | 1N2R        | Model                     |
| 22        | HLA-B*4901 (9)            | 1E27        | Model                     |
| 23        | HLA-B*5101 (9)            | 1E27        | Crystal Structure         |
| 24        | HLA-Cw*0401 (9)           | 1QQD        | Crystal Structure         |
| <b>25</b> | <b>HLA-DRB1*0401 (14)</b> | <b>1BX2</b> | <b>Model</b>              |
| 26        | H2-Db (9)                 | 1BZ9        | Crystal Structure         |
| 27        | H2-Kb (8)                 | 1BQH        | Crystal Structure         |
| 28        | H2-Kd (9)                 | 1BZ9        | Model                     |
| 29        | H2-Kk (8)                 | 1BQH        | Model                     |
| <b>30</b> | <b>H2-Ab (15)</b>         | <b>1MUJ</b> | <b>Crystal Structure</b>  |
| <b>31</b> | <b>DRB1_0101</b>          | <b>1KLG</b> | <b>Crystal Structure</b>  |
| <b>32</b> | <b>DRB1_0301</b>          | <b>1A6A</b> | <b>Crystal Structure</b>  |
| <b>33</b> | <b>DRB1_0401</b>          | <b>1J8H</b> | <b>Crystal Structure</b>  |
| <b>34</b> | <b>DRB1_0404</b>          | <b>1BX2</b> | <b>Model</b>              |
| <b>35</b> | <b>DRB1_0405</b>          | <b>1BX2</b> | <b>Model</b>              |
| <b>36</b> | <b>DRB1_0701</b>          | <b>1BX2</b> | <b>Model</b>              |
| <b>37</b> | <b>DRB1_0802</b>          | <b>1A6A</b> | <b>Model</b>              |
| <b>38</b> | <b>DRB1_0901</b>          | <b>1H15</b> | <b>Model</b>              |

|           |                  |             |                          |
|-----------|------------------|-------------|--------------------------|
| <b>39</b> | <b>DRB1_1101</b> | <b>1A6A</b> | <b>Model</b>             |
| <b>40</b> | <b>DRB1_1302</b> | <b>1A6A</b> | <b>Model</b>             |
| <b>41</b> | <b>DRB1_1501</b> | <b>1BX2</b> | <b>Crystal Structure</b> |
| <b>42</b> | <b>DRB3_0101</b> | <b>1A6A</b> | <b>Model</b>             |
| <b>43</b> | <b>DRB4_0101</b> | <b>1BX2</b> | <b>Model</b>             |
| <b>44</b> | <b>DRB5_0101</b> | <b>1H15</b> | <b>Crystal Structure</b> |

**Table S2:** List of human class I MHC allele sequences obtained from IMGT/HLA database.

| <b>Serial Number</b> | <b>Class I MHC Allele</b> | <b>Number of Alleles</b> |
|----------------------|---------------------------|--------------------------|
| 1                    | HLA-A                     | 494                      |
| 2                    | HLA-B                     | 833                      |
| 3                    | HLA-C                     | 264                      |
| <b>Total</b>         |                           | <b>1591</b>              |

**Table S3:** List of human class II MHC allele sequences obtained from IMGT/HLA database.

| <b>Serial Number</b> | <b>Class II MHC Allele</b> | <b>Number of Alleles</b> |
|----------------------|----------------------------|--------------------------|
| 1                    | DRA                        | 2                        |
| 2                    | DRB                        | 524                      |
| 3                    | DQA1                       | 25                       |
| 4                    | DQB1                       | 66                       |
| 5                    | DPA1                       | 15                       |
| 6                    | DPB1                       | 114                      |
| <b>Total</b>         |                            | <b>746</b>               |

**Table S4:** List of human class I MHC-peptide complexes obtained from PDB.

| <b>Serial Number</b> | <b>Class I MHC Allele</b> | <b>Number of Structures</b> |
|----------------------|---------------------------|-----------------------------|
| 1                    | A*0101                    | 1                           |
| 2                    | A*0201                    | 66                          |
| 3                    | A*0265                    | 7                           |
| 4                    | A*0312                    | 2                           |
| 5                    | A*0326                    | 5                           |
| 6                    | A*1101                    | 4                           |
| 7                    | A*6801                    | 1                           |
| 8                    | B*0733                    | 1                           |
| 9                    | B*0801                    | 2                           |
| 10                   | B*0802                    | 1                           |
| 11                   | B*1505                    | 3                           |
| 12                   | B*2705                    | 1                           |
| 13                   | B*2709                    | 4                           |
| 14                   | B*2713                    | 4                           |
| 15                   | B*3501                    | 1                           |
| 16                   | B*3508                    | 5                           |
| 17                   | B*3542                    | 11                          |
| 18                   | B*3709                    | 2                           |
| 19                   | B*4402                    | 1                           |
| 20                   | B*4403                    | 2                           |
| 21                   | B*4405                    | 1                           |
| 22                   | B*5101                    | 2                           |
| 23                   | B*5301                    | 2                           |
| 24                   | B*5703                    | 3                           |
| 25                   | B*5711                    | 1                           |
| 26                   | B*5815                    | 1                           |
| 27                   | Cw*0304                   | 1                           |
| 28                   | Cw*0401                   | 2                           |
| 29                   | Cw*0602                   | 1                           |
| 30                   | Cw*0741                   | 2                           |
| 31                   | Cw*1202                   | 7                           |
| 32                   | Cw*1802                   | 1                           |
| <b>Total</b>         |                           | <b>148</b>                  |

**Table S5:** List of human class II MHC-peptide complexes obtained from PDB.

| Serial Number | Class II MHC Allele         | Number of Structures |
|---------------|-----------------------------|----------------------|
| 1             | HLA-DRB1*0301               | 1                    |
| 2             | HLA-DRB1*0101               | 23                   |
| 3             | HLA-DRB1*1501               | 2                    |
| 4             | HLA-DRB1*0401               | 2                    |
| 5             | HLA-DRB3*0101               | 1                    |
| 6             | HLA-DRB5*0101               | 4                    |
| 7             | HLA-DQA1*0501_HLA-DQB1*0201 | 1                    |
| 8             | HLA-DQA1*0302_HLA-DQB1*0302 | 3                    |
| 9             | HLA-DQA1*0102_HLA-DQB1*0602 | 1                    |
| 10            | HLA_DQA1*0303_HLA_DQB1*0310 | 4                    |
| <b>Total</b>  |                             | <b>42</b>            |

**Table S6:** List of mouse class I and class II MHC-peptide complexes obtained from PDB.

| Serial Number | Mouse Allele | MHC Class | No of Structures |
|---------------|--------------|-----------|------------------|
| 1             | H2-D         | Class I   | 1                |
| 2             | H2-Db        | Class I   | 16               |
| 3             | H2-Dd        | Class I   | 3                |
| 4             | H2-Kb        | Class I   | 34               |
| 5             | H2-Ab        | Class II  | 2                |
| 6             | H2-Ad        | Class II  | 2                |
| 7             | H2-Ak        | Class II  | 4                |
| 8             | H2-A-nod     | Class II  | 2                |
| 9             | H2-Ek        | Class II  | 8                |
| 10            | H2-E         | Class II  | 1                |
| <b>Total</b>  |              |           | <b>73</b>        |

**Table S7:** List of crystal structures of class I MHC alleles which bind a peptide whose source protein could be identified in the SWISSPROT database.

| Serial Number | MHC Allele | Number of structures |
|---------------|------------|----------------------|
| 1             | A*0101     | 1                    |
| 2             | A*0201     | 17                   |
| 3             | A*0265     | 1                    |
| 4             | A*0312     | 1                    |
| 5             | A*0326     | 2                    |
| 6             | A*1101     | 4                    |
| 7             | A*2402     | 1                    |
| 8             | A*6801     | 1                    |
| 9             | B*0733     | 1                    |
| 10            | B*0801     | 1                    |
| 11            | B*1505     | 3                    |
| 12            | B*2705     | 1                    |
| 13            | B*2709     | 3                    |
| 14            | B*2713     | 2                    |
| 15            | B*3501     | 1                    |
| 16            | B*3508     | 4                    |
| 17            | B*3542     | 3                    |
| 18            | B*3709     | 1                    |
| 19            | B*4402     | 1                    |
| 20            | B*4403     | 1                    |
| 21            | B*4405     | 1                    |
| 22            | B*5101     | 2                    |
| 23            | B*5301     | 2                    |
| 24            | B*5703     | 3                    |
| 25            | B*5711     | 1                    |
| 26            | Cw*0304    | 1                    |
| 27            | Cw*0602    | 1                    |
| 28            | Cw*0741    | 3                    |
| 29            | Cw*1202    | 3                    |
| 30            | Cw*1802    | 1                    |
| 31            | E*0101     | 1                    |
| 32            | G*0101     | 1                    |
| 33            | G*0104     | 1                    |
| 34            | H2-Db      | 5                    |
| 35            | H2-Dd      | 1                    |
| 36            | H2-Kb      | 7                    |
| <b>Total</b>  |            | <b>84</b>            |

**Table S8:** List of crystal structures of class II MHC alleles which bind a peptide whose source protein could be identified in the SWISSPROT database.

| <b>Serial Number</b> | <b>Class II MHC allele</b>  | <b>Number of structures</b> |
|----------------------|-----------------------------|-----------------------------|
| 1                    | H2-Ad                       | 1                           |
| 2                    | H2-Ak                       | 3                           |
| 3                    | H2-Ek                       | 2                           |
| 4                    | HLA-DQA1*0102_HLA-DQB1*0602 | 1                           |
| 5                    | HLA-DQA1*0302_HLA-DQB1*0302 | 3                           |
| 6                    | HLA-DRB1*0101               | 7                           |
| 7                    | HLA-DRB1*0401               | 1                           |
| 8                    | HLA-DRB1*1501               | 1                           |
| 9                    | HLA-DRB5*0101               | 3                           |
| <b>Total</b>         |                             | <b>22</b>                   |
